# Supplementary material for: Fasting GLP-1 Levels and Albuminuria Are Negatively Associated in Patients with Type 2 Diabetes Mellitus
Source: MDPI journal article supplement (doi:10.3390/jpm14030280), 2024-03-01
Supplement: s1 [file s1]

Supplementary Table S1. A list of medications used by participants in low (L) and high (H) groups of fasting plasma GLP-1 levels.

| Medications                     | Fasting plasma GLP-1 (pmol/L)        |                                          |                         | <i>p</i> -value |
|---------------------------------|--------------------------------------|------------------------------------------|-------------------------|-----------------|
|                                 | Group L*<br>(<1.83)<br><i>n</i> = 34 | Group H*<br>(1.83-3.32)<br><i>n</i> = 34 | Total*<br><i>n</i> = 68 |                 |
| ACEi or ARB                     | 16 (47.1)                            | 14 (41.2)                                | 30(44.1)                | 0.807           |
| Beta blocker                    | 9 (26.5)                             | 4 (11.8)                                 | 13 (19.1)               | 0.217           |
| Calcium channel blocker         | 10 (29.4)                            | 7 (20.6)                                 | 17 (25.0)               | 0.575           |
| Spirolactone                    | 1 (2.9)                              | 1 (2.9)                                  | 2 (2.9)                 | 1.000           |
| Hydralazine                     | 0 (0.0)                              | 1 (2.9)                                  | 1 (1.5)                 | 1.000           |
| Insulin                         | 8 (23.5)                             | 5 (14.7)                                 | 13 (19.1)               | 0.537           |
| Metformin                       | 29 (85.3)                            | 32 (94.1)                                | 61 (89.7)               | 0.425           |
| Sulfonylurea                    | 14 (41.2)                            | 14 (41.2)                                | 28 (41.2)               | 1.000           |
| SGLT-2 inhibitor                | 2 (5.9)                              | 9 (26.5)                                 | 11 (16.2)               | 0.048           |
| Thiazolidinedione               | 7 (20.6)                             | 3 (8.8)                                  | 10 (14.7)               | 0.304           |
| DPP-4 inhibitor                 | 21 (61.8)                            | 21 (61.8)                                | 42 (61.8)               | 1.000           |
| Meglitinide                     | 1 (2.9)                              | 0 (0.0)                                  | 1 (1.5)                 | 1.000           |
| $\alpha$ -glucosidase inhibitor | 1 (2.9)                              | 0 (0.0)                                  | 1 (1.5)                 | 1.000           |

\*Data are expressed as *n* (%).
